# Supplementary material for: Recombinant IFN-γ from the bank vole Myodes glareolus: a novel tool for research on rodent reservoirs of zoonotic pathogens
Source: PubMed Central journal article supplement (PMC5809609; doi:10.1038/s41598-018-21143-0), 2018-02-12
Supplement: 41598_2018_21143_MOESM1_ESM.pdf [file 41598_2018_21143_MOESM1_ESM.pdf]

**Recombinant IFN- $\gamma$  from the bank vole *Myodes glareolus*:  
a novel tool for research on rodent reservoirs of zoonotic pathogens**

Francesca Torelli<sup>a</sup>, Steffen Zander<sup>a</sup>, Heinz Ellerbrok<sup>b</sup>, Georg Kochs<sup>c</sup>, Rainer G. Ulrich<sup>d</sup>,  
Christian Klotz<sup>a</sup>, Frank Seeber<sup>a\*</sup>

<sup>a</sup> Department of Mycotic and Parasitic Agents and Mycobacteria, Robert Koch-Institut, Berlin, Germany

<sup>b</sup> Center for Biological Threats and Special Pathogens, Highly Pathogenic Viruses, Robert Koch-Institut, Berlin, Germany

<sup>c</sup> Institute of Virology, Medical Center – University of Freiburg, Faculty of Medicine, University of Freiburg, Germany

<sup>d</sup> Institute of Novel and Emerging Infectious Diseases, Friedrich-Loeffler-Institut, Federal Research Institute for Animal Health, Greifswald-Insel Riems, Germany

\* Corresponding author: seeberf@rki.de

**Supplementary Methods**

**Related to Fig. 1:**

**BLAST servers used for vole genomes:**

[BLAST \*Microtus agrestis\*](#)

[BLAST \*Apodemus sylvaticus\*](#)

[BLAST \*Myodes glareolus\*](#)

[BLAST \*Ellobius lutescens\*](#)

**Assembly of IFN- $\gamma$  sequences from draft genomes:**

*Apodemus sylvaticus*: assembled from whole genome shotgun sequences:

Scaffold6812 (<https://www.ncbi.nlm.nih.gov/Traces/wgs/LIPJ01/LIPJ01006807>)

C77709064 (<https://www.ncbi.nlm.nih.gov/Traces/wgs/LIPJ01/LIPJ01502169>)

*Myodes glareolus*: assembled from whole genome shotgun sequences:

scaffold141145 (<https://www.ncbi.nlm.nih.gov/Traces/wgs/LIPI01/LIPI01140256>)

scaffold60943 (<https://www.ncbi.nlm.nih.gov/Traces/wgs/LIPI01/LIPI01060555>)

scaffold6355 (<https://www.ncbi.nlm.nih.gov/Traces/wgs/LIPI01/LIPI01006333>)

*Microtus agrestis*: assembled from whole genome shotgun sequences:

scaffold3995 (<https://www.ncbi.nlm.nih.gov/Traces/wgs/LIQJ01/LIQJ01003986>)

*Ellobius lutescens*: assembled from whole genome shotgun sequence:

scaffold8069 <https://www.ncbi.nlm.nih.gov/Traces/wgs/LOEQ01/LOEQ01008069>

**Other sequences retrieved via the following accession numbers:**

*Peromyscus maniculatus bairdii* [XP\\_006973418.1](#)

*Microtus ochrogaster* [XP\\_005357970.1](#)

*Rattus norvegicus* [NP\\_620235.1](#)

*Homo sapiens* [NP\\_000610.2](#)

*Mus musculus* BL6 [NP\\_032363.1](#)

**Taxonomic tree in Fig. 1A was according to**

<https://www.ncbi.nlm.nih.gov/Taxonomy/CommonTree/wwwcmt.cgi>

**Related to Fig. 4:**

putative *Irgb2-b1* sequence from *Microtus ochrogaster* for qPCR primer design:

[https://www.ncbi.nlm.nih.gov/nuccore/XM\\_005350187](https://www.ncbi.nlm.nih.gov/nuccore/XM_005350187)

*Microtus ochrogaster* tyrosine 3-monooxygenase/tryptophan 5-monooxygenase activation protein, zeta (Ywhaz), transcript variant X1:

<https://www.ncbi.nlm.nih.gov/nuccore/913515031>

>> its genomic sequence used for primer design:

NW\_004949127.1:1460000-1482000 *Microtus ochrogaster* isolate Prairie Vole\_2

<https://www.ncbi.nlm.nih.gov/nuccore/530286854?report=fasta&from=1460000&to=1482000>

>> qPCR primers extend over intron 4, with 1764 bp, whereas mRNA-derived product is 155 bp

*Mus musculus* tyrosine 3-monooxygenase/tryptophan 5-monooxygenase activation protein, zeta polypeptide (Ywhaz), transcript variant X1:

[https://www.ncbi.nlm.nih.gov/nuccore/NM\\_011740.3](https://www.ncbi.nlm.nih.gov/nuccore/NM_011740.3)

**Related to Figure S1:**

Data extracted from supplementary data from: Han, B. A., Schmidt, J. P., Bowden, S. E. & Drake, J. M. Rodent reservoirs of future zoonotic diseases. *Proceedings of the National Academy of Sciences* **112**, 7039–7044 (2015) and “Rodent reservoirs of future zoonotic diseases. Dryad Digital Repository. <https://doi.org/10.5061/dryad.7fh4q> “. Species names were extracted from this table in which reservoirs are indicated as „flag“.



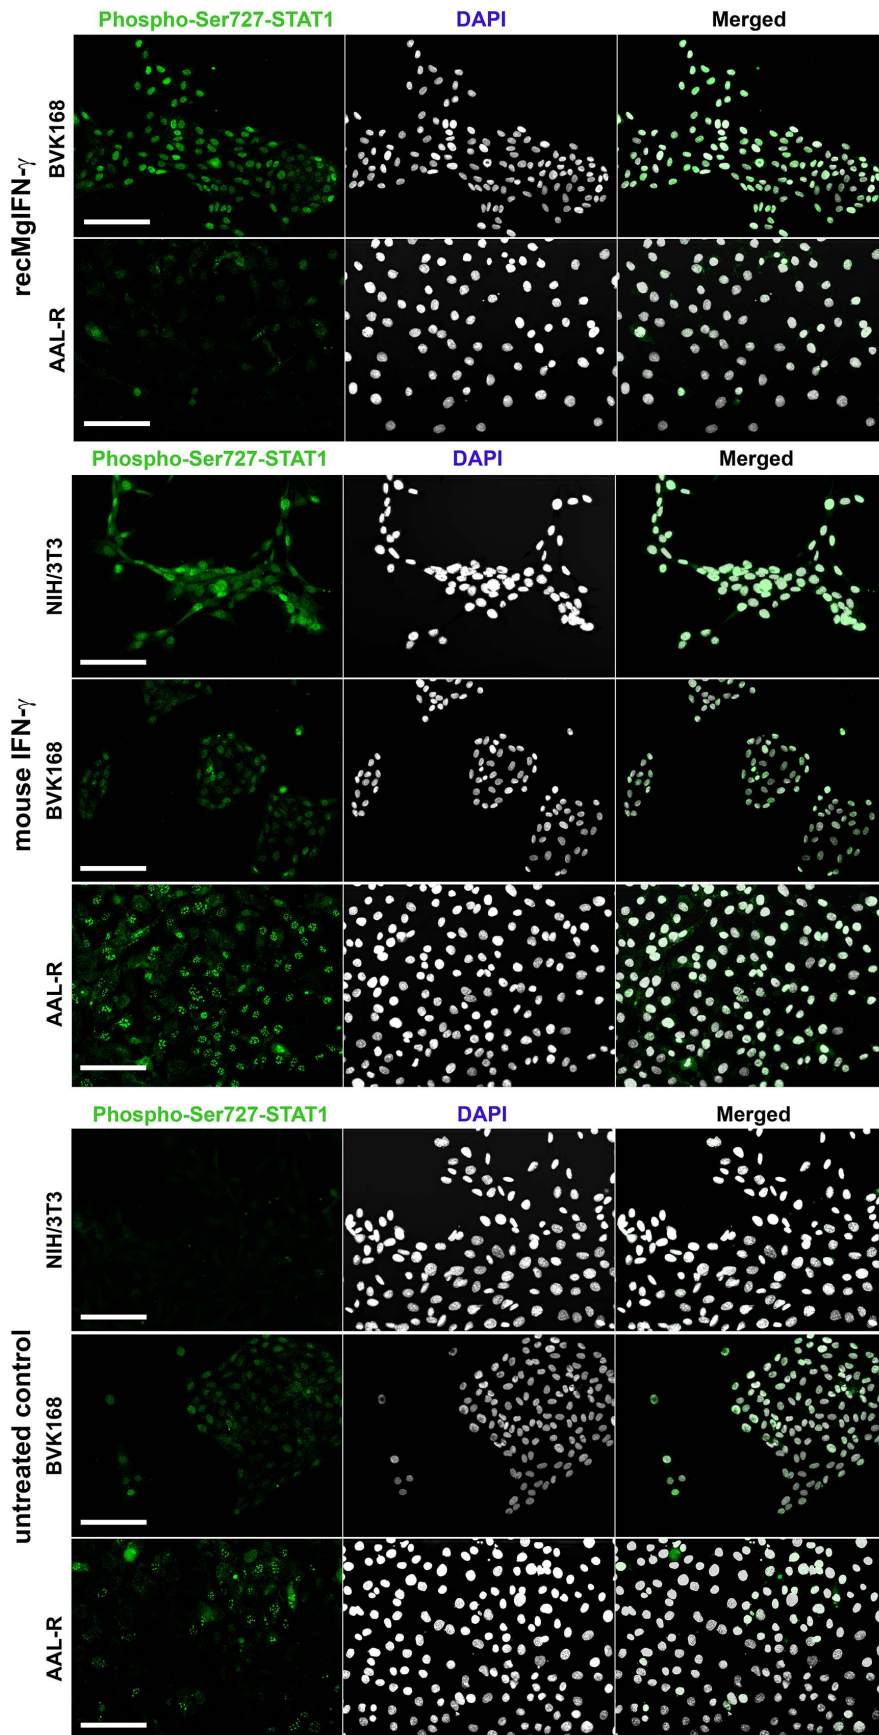

**Supplementary Fig. S2**

Ser727-STAT1 phosphorylation confirms the activity of recMgIFN- $\gamma$  on BVK168 cell line and of mouse IFN- $\gamma$  on AAL-R cell line.

Cells were either stimulated for 1h with recMgIFN- $\gamma$  (200 ng/ml, upper panel), with mouse IFN- $\gamma$  (200 U/ml, central panel) or left untreated as control (lower panel). In each panel the following staining is shown from left to right: phospho-Ser727-STAT1 staining (green), DAPI staining (white) and overlay of the two signals.

A representative experiment of two replicates is shown. The scale bar represents 100  $\mu$ m.

**Supplementary Table S1: Commercial reagents**

| <b>Immune Reagents</b>          | <b>Reagent Species</b> | <b>Cross-reactivity</b>                                                                      | <b>Reference</b>                                                                            |
|---------------------------------|------------------------|----------------------------------------------------------------------------------------------|---------------------------------------------------------------------------------------------|
| reclFN- $\alpha$ B/D            | <i>Homo sapiens</i>    | <i>M. glareolus</i> BVK168 cell line                                                         | Horisberger, M. A. & de Staritzky, K. <i>J Gen Virol</i> <b>68 ( Pt 3)</b> , 945-948 (1987) |
| IFN- $\gamma$                   | <i>M. musculus</i>     | <i>A. agrarius</i> AAL-R cell line                                                           | Peptotech Cat. n° 315-05                                                                    |
| <b>Primary antibodies</b>       |                        |                                                                                              |                                                                                             |
| mAb anti-Phospho-Stat1 (Tyr701) | rabbit anti-mouse      | <i>M. glareolus</i> BVK168<br><i>M. arvalis</i> FMN-R<br><i>A. agrarius</i> AAL-R cell lines | Cell Signaling Technology Cat. n° 9167                                                      |
| mAb anti-Phospho-Stat1 (Ser727) | rabbit anti-mouse      | <i>M. glareolus</i> BVK168<br><i>A. agrarius</i> AAL-R cell lines                            | Cell Signaling Technology Cat. n° 8826                                                      |
